# Supplementary material
Source: publisher figshare collection journal article supplement (https://sage.figshare.com/ndownloader/files/21773901)
Supplement: Supplementary file 1 [file 21773901]

Supplemental Table 1. Summary of observed changes in RHC-derived parameters of right ventricular function and their physiological relevance in patients with mild and severe PAH (Table 3) and incident PAH patients on therapy (Table 2).

|                             | $\Delta$ in<br>PAH<br>Severity<br>(Table<br>3) | $\Delta$ with<br>therapy<br>(Table<br>2) | Physiological Relevance                                                                                                                                                               |
|-----------------------------|------------------------------------------------|------------------------------------------|---------------------------------------------------------------------------------------------------------------------------------------------------------------------------------------|
| <b>RV systolic function</b> |                                                |                                          |                                                                                                                                                                                       |
| Max dP/dt                   | ↑                                              | - /↓                                     | Maximum rate of pressure change in the ventricle<br><br>A load-dependent measure of RV contractility that is influenced by preload, afterload, heart rate and myocardial hypertrophy. |
| Contractile Index           | ↓                                              | - /↑                                     | Normalizes max dP/dt to systolic RV pressure to account for afterload.                                                                                                                |
| End-systolic<br>Elastance   | ↑                                              | ↓                                        | A load independent measure of RV contractility                                                                                                                                        |
| <b>RV afterload/work</b>    |                                                |                                          |                                                                                                                                                                                       |
| Arterial Elastance          | ↑                                              | ↓                                        | A measure of the RV afterload                                                                                                                                                         |
| Stroke Work                 | ↑                                              | -                                        | A measure of RV function that incorporates ventricular function and hemodynamics.                                                                                                     |
| <b>RV-PA coupling</b>       |                                                |                                          |                                                                                                                                                                                       |

|                                             |     |     |                                                                                                                                                             |
|---------------------------------------------|-----|-----|-------------------------------------------------------------------------------------------------------------------------------------------------------------|
| Ees/Ea (Pmax – ESP)/ESP                     | -/↓ | -/↑ | A load independent measure of Ventricular Vascular coupling Reduced ratio in patients with PAH (normal ~1-2) but does not associated with mortality.        |
| <b>RV diastolic function</b>                |     |     |                                                                                                                                                             |
| Min dP/dt                                   | ↓   | -/↑ | Minimum rate of pressure change in the ventricle.<br><br>Increased min dP/dt suggests improved relaxation.                                                  |
| Myocardial Performance Index (RV Tei-index) | -   | -   | A measure of RV global function that is independent of heart rate and ventricular geometry. Potentially useful when there is distorted ventricular geometry |
| RV diastolic stiffness coefficient, $\beta$ | ↑   | ↓   | A measure of chamber stiffness and is increased in patients with PAH and associates with effect of therapy and mortality in PAH. <sup>1-4</sup>             |
| End-Diastolic Elastance                     | ↑   | ↓   | Slope of the end-diastolic pressure volume relationship at the end-diastolic volume. <sup>1,3</sup>                                                         |

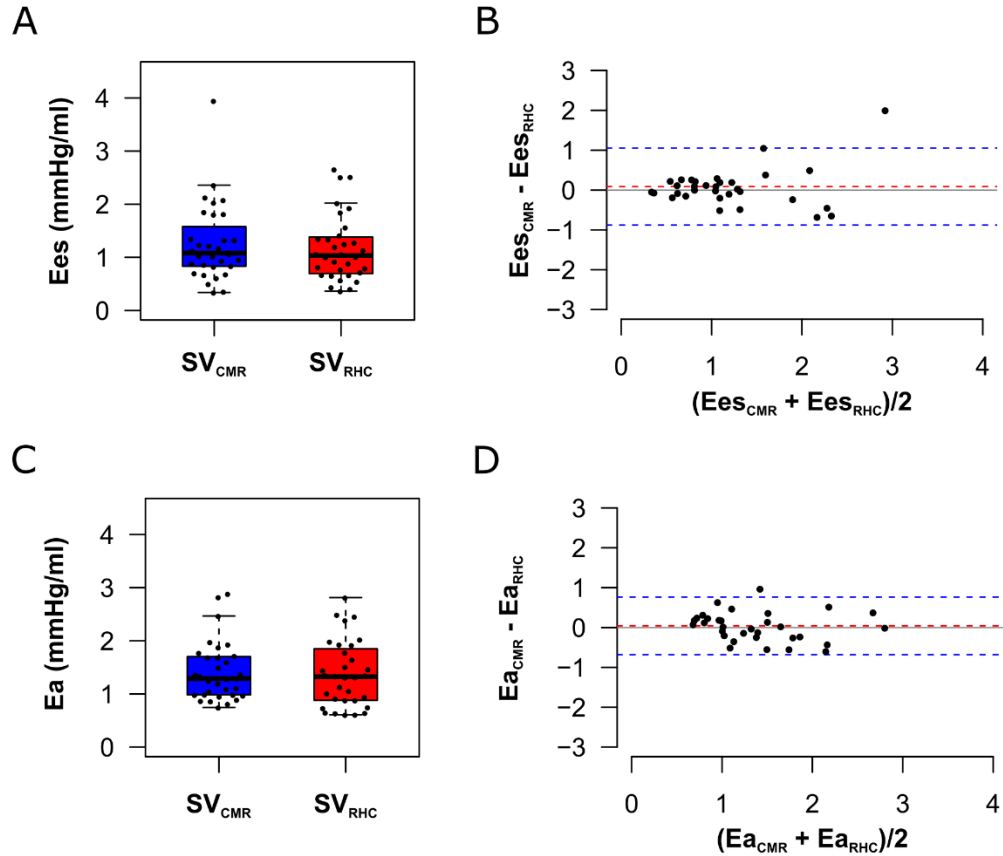

**Supplemental Figure 1. RV stroke volume has a significant effect on the precision of RV contractility (Ees) and afterload (Ea).** There were no significant differences in Ees (A) or Ea (C) when calculated using CMR-derived or RHC-derived stroke volume. Stroke volume has a significant effect on the limits of agreement between estimates of Ees (B) and Ea (D).

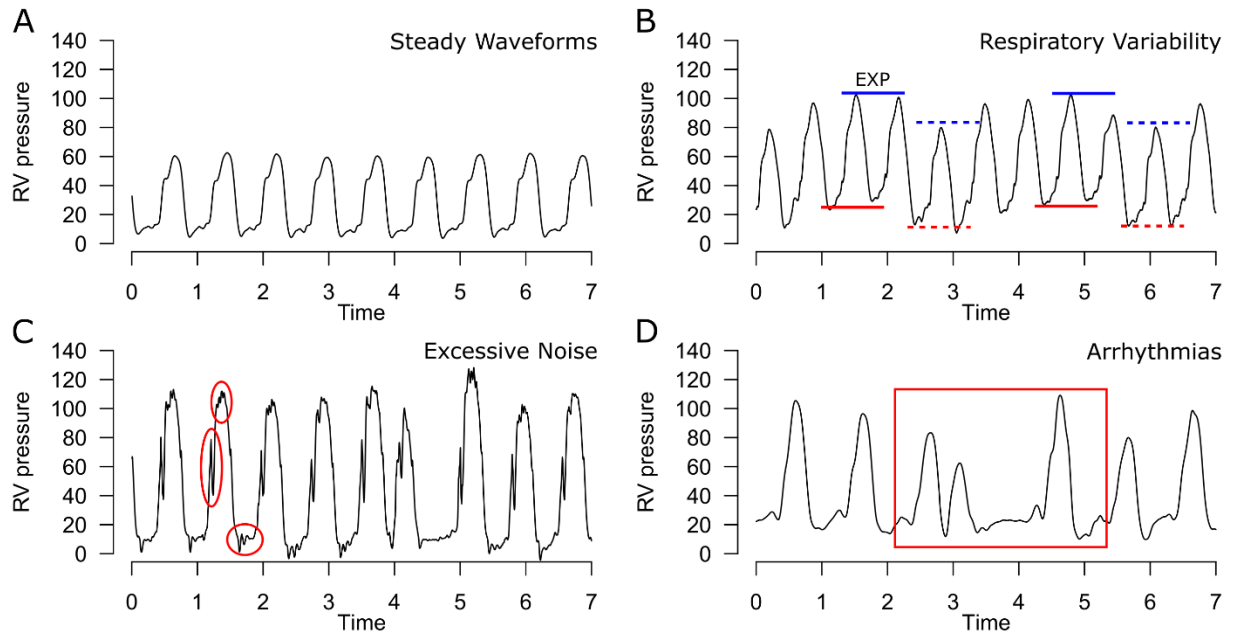

c

**Supplemental Figure 2. The quality of the recorded RV pressure waveform is a major source of variability in the analysis of RV function. *A*)** Steady waveforms are optimal for analysis because they have little beat to beat variability. ***B*)** In the presence of respiratory variability, there can be large swings in pressure between expiratory (EXP, solid lines) and inspiratory (dotted lines) pressure. ***C*)** Excessive high frequency noise (red circles) is a confounding factor in analysis and can create artificial peaks. ***D*)** Arrhythmias tend to reduce the number of representative beats that can be used in the analysis.

### Supplemental Material References

1. Trip P, Rain S, Handoko ML, et al. Clinical relevance of right ventricular diastolic stiffness in pulmonary hypertension. *Eur Respir J* 2015; 45: 1603–12.
2. Vanderpool RR, Pinsky MR, Naeije R, et al. RV-pulmonary arterial coupling predicts outcome in patients referred for pulmonary hypertension. *Heart* 2015; 101: 37–43.
3. Vanderpool RR, Desai AA, Knapp SM, et al. How prostacyclin therapy improves right ventricular function in pulmonary arterial hypertension. *Eur Respir J* 2017; 50: 1700764.
4. Rain S, Handoko ML, Trip P, et al. Right ventricular diastolic impairment in patients with pulmonary arterial hypertension. *Circulation* 2013; 128: 2016–25.
